# Supplementary material for: Coordination site manipulation of the annular growth mechanism to assemble chiral lanthanide clusters with different shapes and magnetic properties
Source: Royal Society of Chemistry journal article supplement (doi:10.1039/d2qi01711c), 2022-01-01
Supplement: d2qi01711c1.pdf [file d2qi01711c1.pdf]

## Supporting Information

### Coordination site manipulation of annular growth mechanism to assemble chiral lanthanide clusters with different shapes and magnetic properties

*Bing-Fan Long,<sup>a</sup> Shui Yu,<sup>a</sup> Zhong-Hong Zhu,<sup>a,\*</sup> Yun-Lan Li,<sup>a</sup> Fu-Pei Liang,<sup>a,b,\*</sup> and Hua-Hong Zou<sup>a,\*</sup>*

<sup>a</sup>School of Chemistry and Pharmaceutical Sciences, State Key Laboratory for Chemistry and Molecular Engineering of Medicinal Resources/Key Laboratory for Chemistry and Molecular Engineering of Medicinal Resources (Ministry of Education of China), Collaborative Innovation Center for Guangxi Ethnic Medicine, School of Chemistry and Pharmaceutical Sciences, Guangxi Normal University, Guilin 541004, P. R. China

<sup>b</sup>Guangxi Key Laboratory of Electrochemical and Magnetochemical Functional Materials, College of Chemistry and Bioengineering, Guilin University of Technology, Guilin 541004, P. R. China

\*E-mail (Corresponding author): 18317725515@163.com (Z.-H. Zhu), liangfupei@glut.edu.cn (F.-P. Liang), gxnuchem@foxmail.com (H.-H. Zou).

**Keywords:** Chiral lanthanide clusters; coordination site; annular growth mechanism; solvothermal synthesis; magnetic properties

## Table of Contents:

| Supporting Tables  |                                                                                                                                                                                                                                                                                                                                                                                                                   |
|--------------------|-------------------------------------------------------------------------------------------------------------------------------------------------------------------------------------------------------------------------------------------------------------------------------------------------------------------------------------------------------------------------------------------------------------------|
| <b>Table S1</b>    | Crystallographic data of the clusters <b>R-1</b> , <b>S-1</b> , <b>R-2</b> and <b>S-2</b> .                                                                                                                                                                                                                                                                                                                       |
| <b>Table S2</b>    | Selected bond lengths (Å) and angles (°) of <b>R-1</b> .                                                                                                                                                                                                                                                                                                                                                          |
| <b>Table S3</b>    | Selected bond lengths (Å) and angles (°) of <b>S-1</b> .                                                                                                                                                                                                                                                                                                                                                          |
| <b>Table S4</b>    | Selected bond lengths (Å) and angles (°) of <b>R-2</b> .                                                                                                                                                                                                                                                                                                                                                          |
| <b>Table S5</b>    | Selected bond lengths (Å) and angles (°) of <b>S-2</b> .                                                                                                                                                                                                                                                                                                                                                          |
| <b>Table S6</b>    | <i>SHAPE</i> analysis of the Dy(III) in cluster <b>R-1</b> .                                                                                                                                                                                                                                                                                                                                                      |
| <b>Table S7</b>    | <i>SHAPE</i> analysis of the Dy(III) in cluster <b>S-1</b> .                                                                                                                                                                                                                                                                                                                                                      |
| <b>Table S8</b>    | <i>SHAPE</i> analysis of the Dy(III) in cluster <b>R-2</b> .                                                                                                                                                                                                                                                                                                                                                      |
| <b>Table S9</b>    | <i>SHAPE</i> analysis of the Dy(III) in cluster <b>S-2</b> .                                                                                                                                                                                                                                                                                                                                                      |
| Supporting Figures |                                                                                                                                                                                                                                                                                                                                                                                                                   |
| <b>Figure S1</b>   | The asymmetric unit of <b>S-1</b> (a) and <b>S-2</b> (d); Ligand coordination mode of clusters <b>S-1</b> (b) and <b>S-2</b> (e); Coordination polyhedron around the Dy(III) ions of clusters <b>S-1</b> (c) and <b>S-2</b> (f and g).                                                                                                                                                                            |
| <b>Figure S2</b>   | Infrared spectra (IR) of clusters <b>R-1</b> , <b>S-1</b> , <b>R-2</b> and <b>S-2</b> (a, b).                                                                                                                                                                                                                                                                                                                     |
| <b>Figure S3</b>   | TG curve of clusters <b>R-1</b> , <b>S-1</b> , <b>R-2</b> and <b>S-2</b> (a–d).                                                                                                                                                                                                                                                                                                                                   |
| <b>Figure S4</b>   | Powder diffraction pattern (PXRD) of clusters <b>R-1</b> , <b>S-1</b> , <b>R-2</b> and <b>S-2</b> (a–d).                                                                                                                                                                                                                                                                                                          |
| <b>Figure S5</b>   | Plots of $\chi_m T$ versus $T$ for clusters <b>R-1</b> and <b>R-2</b> (a, b). $M$ vs. $H/T$ plots of clusters <b>R-1</b> and <b>R-2</b> (c, d).                                                                                                                                                                                                                                                                   |
| <b>Figure S6</b>   | Loop curve graph of clusters <b>R-1</b> and <b>R-2</b> at 2 K (a, b).                                                                                                                                                                                                                                                                                                                                             |
| <b>Figure S7</b>   | Temperature-dependent $\chi'$ and $\chi''$ AC susceptibilities under 1000 Oe dc fields for <b>R-2</b> (a); Variable-frequency AC susceptibilities ( $H = 1000$ Oe) of cluster <b>R-2</b> at different temperatures (b and c) and Cole-Cole plots from AC susceptibilities (d).                                                                                                                                    |
| <b>Figure S8</b>   | Plots of $\chi_m T$ versus $T$ for clusters <b>S-1</b> and <b>S-2</b> (a, b). $M$ vs. $H/T$ plots of clusters <b>S-1</b> and <b>S-2</b> (c, d).                                                                                                                                                                                                                                                                   |
| <b>Figure S9</b>   | Loop curve graph of clusters <b>S-1</b> (a) and <b>S-2</b> (b) at 2 K.                                                                                                                                                                                                                                                                                                                                            |
| <b>Figure S10</b>  | Temperature-dependent $\chi'$ and $\chi''$ AC susceptibilities under 0 Oe dc fields for <b>S-1</b> (a); Cole-Cole plots for <b>S-1</b> (b).                                                                                                                                                                                                                                                                       |
| <b>Figure S11</b>  | Plots of $\chi''$ vs. $\nu$ (10–999 Hz) at 2 K under 0–3000 Oe dc field with a 2 Oe oscillating ac field for clusters <b>R-1</b> (a) and <b>S-1</b> (b); Field-dependence of the relaxation time (squares) and the best fit curve (red line) for <b>R-1</b> (c) and <b>S-1</b> (d); Temperature-dependent $\chi'$ and $\chi''$ AC susceptibilities under 1000 Oe dc fields for <b>R-1</b> (e) and <b>S-1</b> (f). |
| <b>Figure S12</b>  | Arrhenius plots generated from the temperature-dependent relaxation times extracted from the Cole-Cole fits of the AC susceptibilities for cluster <b>S-1</b> under 0 Oe dc field (a and b). Symbols show the extracted times, and the lines are least-squares fits.                                                                                                                                              |

**Figure S13**

Temperature-dependent  $\chi'$  and  $\chi''$  AC susceptibilities under 0 Oe dc fields and 1000 Oe dc fields for **S-2** (a) and (b).

## Experimental Section

### Materials and Measurements.

All chemicals and solvents were analytical grade and were used without further purification. The infrared spectra were carried out on a Pekin-Elmer Two spectrophotometer with pressed KBr pellets. The elemental analyses were determined on a Perkin-Elmer model 240 °C elemental analyzer. The powder X-ray diffraction (PXRD) spectra were measured on a Rigaku D/Max-3c diffractometer with Cu-K $\alpha$  radiation ( $\lambda = 1.5418 \text{ \AA}$ ) and Mo-K $\alpha$  radiation ( $\lambda = 0.71073 \text{ \AA}$ ). Thermogravimetric analyses were performed on a PerkinElmer Pyris Diamond TG-DTA instrument under an N<sub>2</sub> atmosphere using a heating rate of 5 °C min<sup>-1</sup> from room temperature up to 1000 °C. The circular dichroism (CD) spectra were recorded on a JASCO J-1500 spectropolarimeter at room temperature. Magnetic properties were performed on a Superconducting Quantum Interference Device (SQUID) magnetometer. The diamagnetism of all constituent atoms was corrected with Pascal's constant.

### X-ray crystallography.

Single-crystal X-ray diffraction (SCXRD) data were collected on a ROD, Synergy Custom DW system, HyPix diffractometer (Cu-K $\alpha$  radiation and  $\lambda = 1.54184 \text{ \AA}$ , Mo-K $\alpha$  radiation and  $\lambda = 0.71073 \text{ \AA}$ ) in  $\Phi$  and  $\omega$  scan modes. The structures were solved by direct methods, and refined by a full-matrix least-squares method on the basis of  $F^2$  by using *SHELXL*.<sup>[1]</sup> Anisotropic thermal parameters were applied to all non-hydrogen atoms. Hydrogen atoms were generated geometrically. Highly disordered free solvent molecules were removed using the SQUEEZE function of PLATON. The crystallographic data for the clusters **R-1**, **S-1**, **R-2** and **S-2** are listed in Table S1, and selected bond lengths and angles are given in Table S2–S5. The CCDC reference numbers for the crystal structures of clusters **R-1**, **S-1**, **R-2** and **S-2** are 2194449-2194452, respectively.

[1] Sheldrick, G. M. *Acta Crystallogr., Sect. C: Struct. Chem.* **2015**, *71*, 3–8.

### The synthesis method.

**Synthesis of R-1:** **R**-mandelic acid hydrazide (0.1 mmol, 0.0166 g), 2,5-dihydroxybenzaldehyde (0.1 mmol, 0.0138 g), DyCl<sub>3</sub>·6H<sub>2</sub>O (0.5 mmol, 0.1885 g) and triethylamine (30  $\mu$ L) were dissolved in mixed solvents of methanol (0.8 mL) and water (0.4 mL) in a Pyrex tube. The tube was sealed and heated at 80 °C in an oven for one day, then cooled down slowly, light green block crystals were obtained with a yield of 70% (based on **R**-mandelic acid hydrazide). Elemental analysis theoretical

value ( $C_{130}H_{172}Cl_2Dy_4N_{16}O_{59}$ ): C, 43.08%; H, 4.78%; N, 6.18%; experimental value: C, 43.01%; H, 4.71%; N, 6.11%. Infrared spectrum data (IR, KBr pellet,  $cm^{-1}$ ): 3349(s), 1635(s), 1565(s), 1482(s), 1438(s), 1381(s), 1279(s), 1205(s), 1164(m), 1094(w), 1063(m), 955(w), 818(s), 726(m), 695(m), 637(w), 529(w).

**Synthesis of S-1:** The synthesis method was similar to that for **R-1** by using **S**-mandelic acid hydrazide instead of **R**-mandelic acid hydrazide. The yield is 70% (based on **S**-mandelic acid hydrazide). Elemental analysis theoretical value ( $C_{125}H_{138}Cl_2Dy_4N_{16}O_{49}$ ): C, 44.56%; H, 4.13%; N, 6.65%; experimental value: C, 44.49%; H, 4.05%; N, 6.58%. Infrared spectrum data (IR, KBr pellet,  $cm^{-1}$ ): 3368(s), 1628(s), 1561(s), 1484(s), 1438(s), 1381(s), 1273(s), 1203(s), 1164(m), 1090(w), 1066(m), 955(w), 822(s), 733(m), 701(m), 637(w), 529(w).

**Synthesis of R-2:** **R**-mandelic acid hydrazide (0.1 mmol, 0.0166 g), 2,3,4-trihydroxybenzaldehyde (0.1 mmol, 0.0154 g),  $Dy(OAc)_3 \cdot 4H_2O$  (0.5 mmol, 0.2058 g) and triethylamine (30  $\mu$ L) were dissolved in mixed solvents of methanol (0.8 mL) and water (0.4 mL) in a Pyrex tube. The tube was sealed and heated at 80 °C in an oven for one day, then cooled down slowly, yellow block crystals were obtained with a yield of 65% (based on **R**-mandelic acid hydrazide). Elemental analysis theoretical value ( $C_{71}H_{101}Dy_6N_6O_{49}$ ): C, 30.48%; H, 3.64%; N, 3.00%; experimental value: C, 30.41%; H, 3.57%; N, 2.95%. Infrared spectrum data (IR, KBr pellet,  $cm^{-1}$ ): 3400(s), 1565(s), 1447(s), 1279(s), 1197(w), 1063(s), 980(w), 792(w), 742(m), 640(m), 485(w).

**Synthesis of S-2:** The synthesis method was similar to that for **R-2** by using **S**-mandelic acid hydrazide instead of **R**-mandelic acid hydrazide. The yield is 65% (based on **S**-mandelic acid hydrazide). Elemental analysis theoretical value ( $C_{69}H_{92}Dy_6N_6O_{46}$ ): C, 30.51%; H, 3.41%; N, 3.09%; experimental value: C, 30.42%; H, 3.33%; N, 3.00%. Infrared spectrum data (IR, KBr pellet,  $cm^{-1}$ ): 3400(s), 1565(s), 1445(s), 1279(s), 1194(w), 1070(s), 983(w), 790(w), 739(m), 640(m), 481(w).

**Table S1.** Crystallographic data of the clusters **R-1**, **S-1**, **R-2** and **S-2**.

|                                                                 | <b>R-1</b>                                                                                        | <b>S-1</b>                                                                                        | <b>R-2</b>                                                                      | <b>S-2</b>                                                                     |
|-----------------------------------------------------------------|---------------------------------------------------------------------------------------------------|---------------------------------------------------------------------------------------------------|---------------------------------------------------------------------------------|--------------------------------------------------------------------------------|
| Formula                                                         | C <sub>130</sub> H <sub>172</sub> Cl <sub>2</sub> Dy <sub>4</sub> N <sub>16</sub> O <sub>59</sub> | C <sub>125</sub> H <sub>138</sub> Cl <sub>2</sub> Dy <sub>4</sub> N <sub>16</sub> O <sub>49</sub> | C <sub>71</sub> H <sub>101</sub> Dy <sub>6</sub> N <sub>6</sub> O <sub>49</sub> | C <sub>69</sub> H <sub>92</sub> Dy <sub>6</sub> N <sub>6</sub> O <sub>46</sub> |
| Formula weight                                                  | 3623.73                                                                                           | 3369.41                                                                                           | 2797.57                                                                         | 2716.48                                                                        |
| <i>T</i> , K                                                    | 100.00(10)                                                                                        | 100.00(10)                                                                                        | 100.00(10)                                                                      | 100.00(10)                                                                     |
| Crystal system                                                  | orthorhombic                                                                                      | orthorhombic                                                                                      | monoclinic                                                                      | monoclinic                                                                     |
| Space group                                                     | <i>I</i> 222                                                                                      | <i>I</i> 222                                                                                      | <i>I</i> 2                                                                      | <i>I</i> 2                                                                     |
| <i>a</i> , Å                                                    | 17.8403(2)                                                                                        | 21.5282(2)                                                                                        | 20.6231(3)                                                                      | 20.6111(5)                                                                     |
| <i>b</i> , Å                                                    | 21.5396(2)                                                                                        | 16.8445(2)                                                                                        | 21.5982(2)                                                                      | 21.5996(3)                                                                     |
| <i>c</i> , Å                                                    | 16.8287(2)                                                                                        | 17.8785(2)                                                                                        | 23.8030(4)                                                                      | 23.8049(6)                                                                     |
| <i>α</i> , °                                                    | 90                                                                                                | 90                                                                                                | 90                                                                              | 90                                                                             |
| <i>β</i> , °                                                    | 90                                                                                                | 90                                                                                                | 114.7848(19)                                                                    | 114.780(3)                                                                     |
| <i>γ</i> , °                                                    | 90                                                                                                | 90                                                                                                | 90                                                                              | 90                                                                             |
| <i>V</i> , Å <sup>3</sup>                                       | 6466.81(12)                                                                                       | 6483.31(12)                                                                                       | 9625.8(3)                                                                       | 9621.9(4)                                                                      |
| <i>Z</i>                                                        | 2                                                                                                 | 2                                                                                                 | 4                                                                               | 4                                                                              |
| <i>D</i> <sub>c</sub> , g cm <sup>-3</sup>                      | 1.618                                                                                             | 1.612                                                                                             | 1.747                                                                           | 1.749                                                                          |
| <i>μ</i> , mm <sup>-1</sup>                                     | 13.266                                                                                            | 13.232                                                                                            | 4.678                                                                           | 4.680                                                                          |
| <i>F</i> (000)                                                  | 3140.0                                                                                            | 3132.0                                                                                            | 4832.0                                                                          | 4836.0                                                                         |
| 2θ range for data collection/°                                  | 6.434 to 151.358                                                                                  | 6.426 to 151.798                                                                                  | 3.952 to 61.084                                                                 | 4.354 to 61.908                                                                |
| Reflns coll.                                                    | 22022                                                                                             | 22126                                                                                             | 77906                                                                           | 48073                                                                          |
| Unique reflns                                                   | 6499                                                                                              | 6533                                                                                              | 24189                                                                           | 21295                                                                          |
| <i>R</i> <sub>int</sub>                                         | 0.0363                                                                                            | 0.0330                                                                                            | 0.0337                                                                          | 0.0268                                                                         |
| <i>R</i> <sub>1</sub> <sup>a</sup> ( <i>I</i> > 2σ( <i>I</i> )) | 0.0569                                                                                            | 0.0546                                                                                            | 0.0420                                                                          | 0.0478                                                                         |
| <i>wR</i> <sub>2</sub> <sup>b</sup> (all data)                  | 0.1580                                                                                            | 0.1501                                                                                            | 0.1353                                                                          | 0.1344                                                                         |
| GOF                                                             | 1.051                                                                                             | 1.046                                                                                             | 1.058                                                                           | 1.034                                                                          |
| Flack parameter                                                 | 0.006(3)                                                                                          | 0.012(4)                                                                                          | 0.029(4)                                                                        | 0.001(5)                                                                       |

$$^a R_1 = \Sigma ||F_o| - |F_c|| / \Sigma |F_o|, \quad ^b wR_2 = [\Sigma w(F_o^2 - F_c^2)^2 / \Sigma w(F_o^2)^2]^{1/2}$$

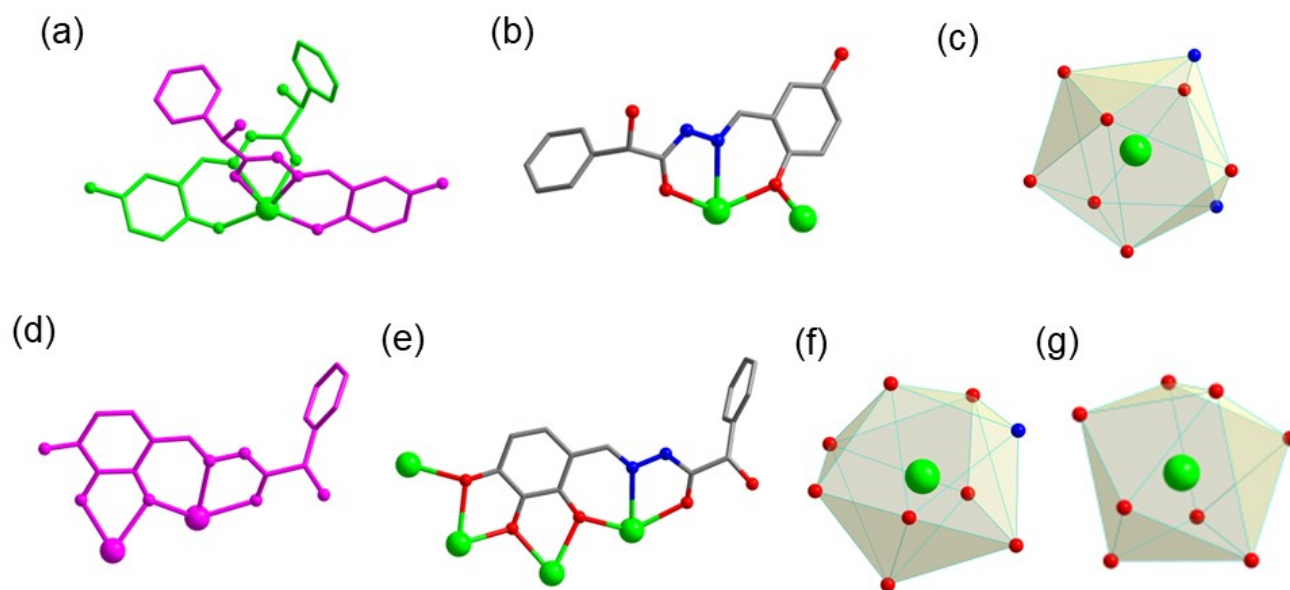

**Figure S1.** The asymmetric unit of **S-1** (a) and **S-2** (d); Ligand coordination mode of clusters **S-1** (b) and **S-2** (e); Coordination polyhedron around the Dy(III) ions of clusters **S-1** (c) and **S-2** (f and g).

### IR spectrum analysis of *R/S-1* and *R/S-2*.

Specifically, for the **R-1** and **S-1** the broad absorption peak around  $3400\text{ cm}^{-1}$  can be attributed to the stretching vibration of water molecule  $\nu(\text{HO-H})$ . The strong peak around  $1600\text{ cm}^{-1}$ ,  $1480\text{ cm}^{-1}$  and  $1210\text{ cm}^{-1}$  can be attributed to the C=N stretching vibration of the imine group (-C=N-), the stretching vibration of C=N and C=C on the aromatic ring and the stretching vibration between the phenolic hydroxyl groups C-O, respectively. Similarly, for the **R-2** and **S-2**, the broad absorption peak around  $3400\text{ cm}^{-1}$  might be attributed to the stretching vibration of water molecule  $\nu(\text{HO-H})$ . The strong peak around  $1560\text{ cm}^{-1}$ ,  $1450\text{ cm}^{-1}$  and  $1200\text{ cm}^{-1}$  might be attributed to the C=N stretching vibration of the imine group (-C=N-), the stretching vibrations of C=N and C=C on the aromatic ring and the stretching vibration between phenolic hydroxyl groups C-O, respectively.

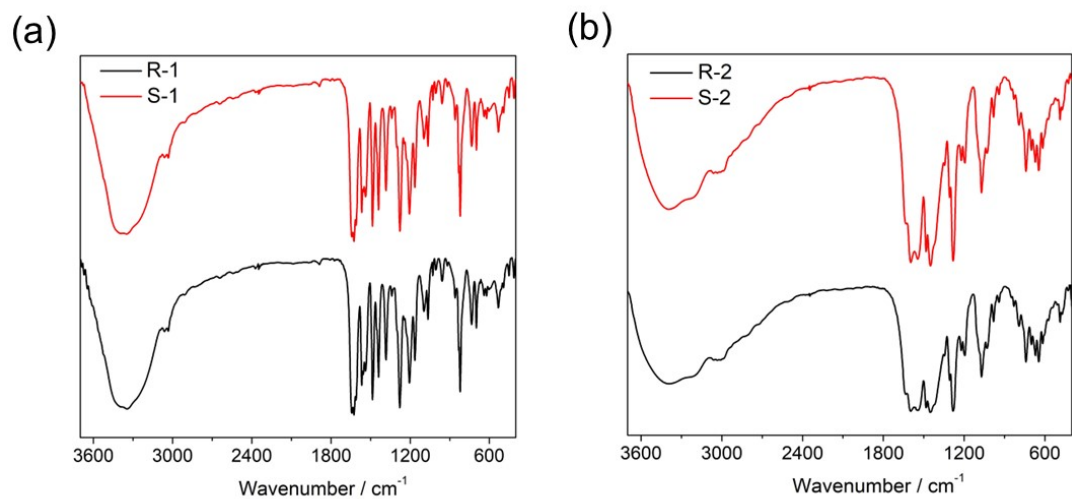

**Figure S2.** Infrared spectra (IR) of clusters *R-1*, *S-1*, *R-2* and *S-2* (a, b).

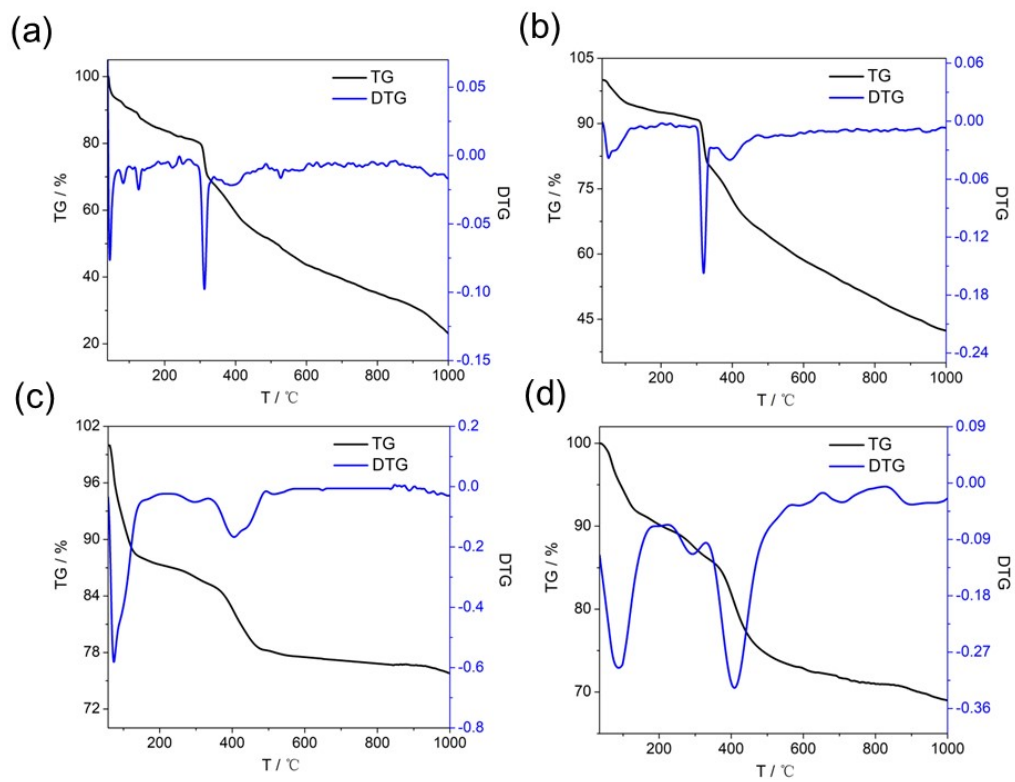

**Figure S3.** TG curve of clusters *R-1*, *S-1*, *R-2* and *S-2* (a-d).



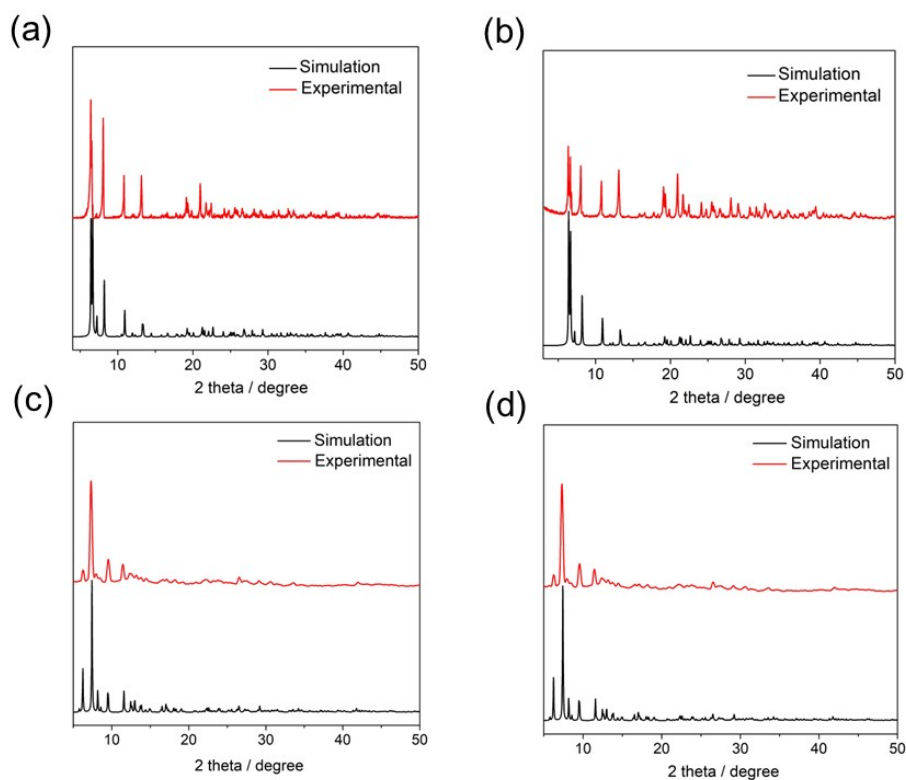

**Figure S4.** Powder diffraction pattern (PXR) of clusters **R-1**, **S-1**, **R-2** and **S-2** (a-d).

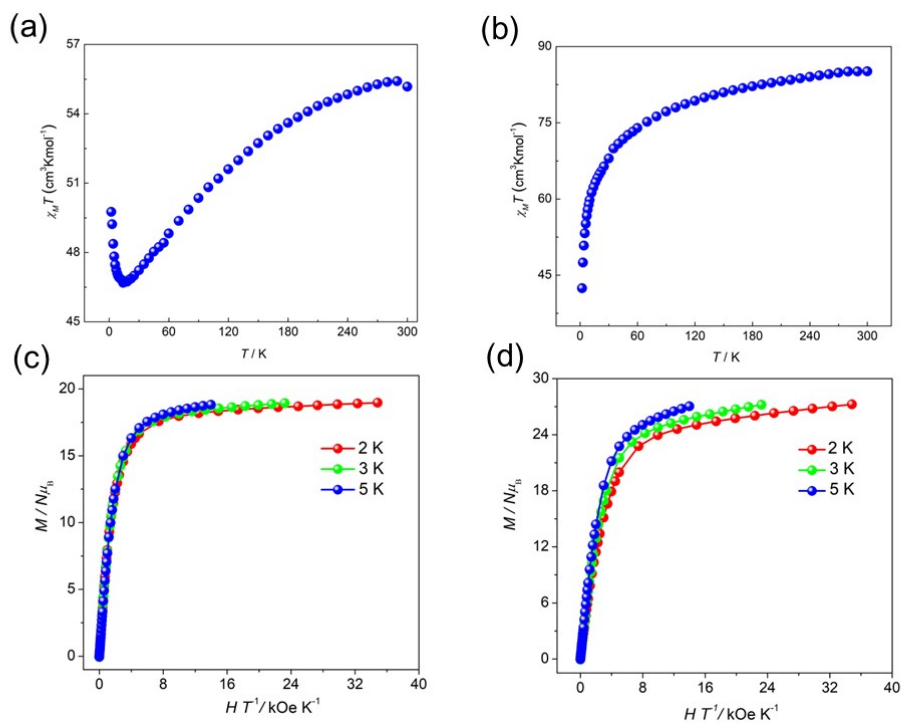

**Figure S5.** Plots of  $\chi_m T$  versus  $T$  for clusters **R-1** and **R-2** (a, b);  $M$  vs.  $H/T$  plots of clusters **R-1** and **R-2** (c, d).

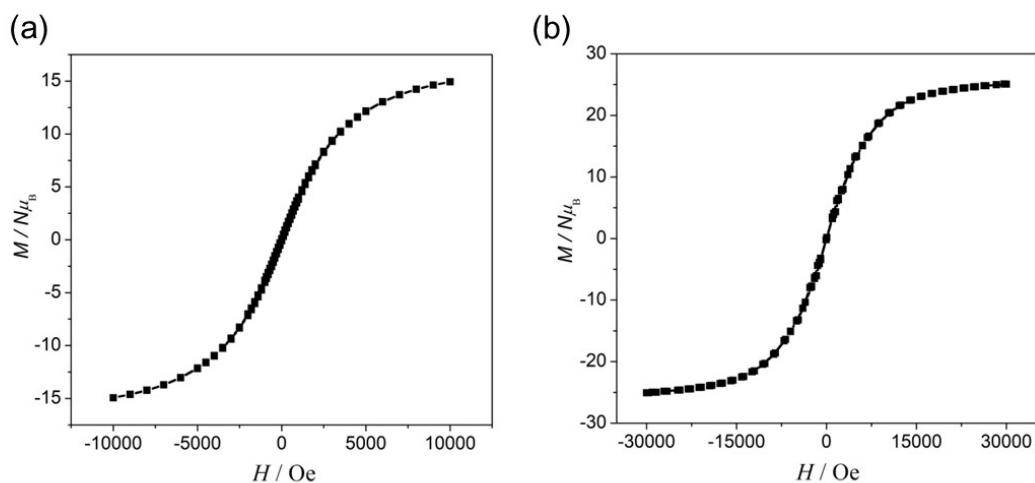

**Figure S6.** Loop curve graph of clusters **R-1** and **R-2** (a, b) at 2 K.

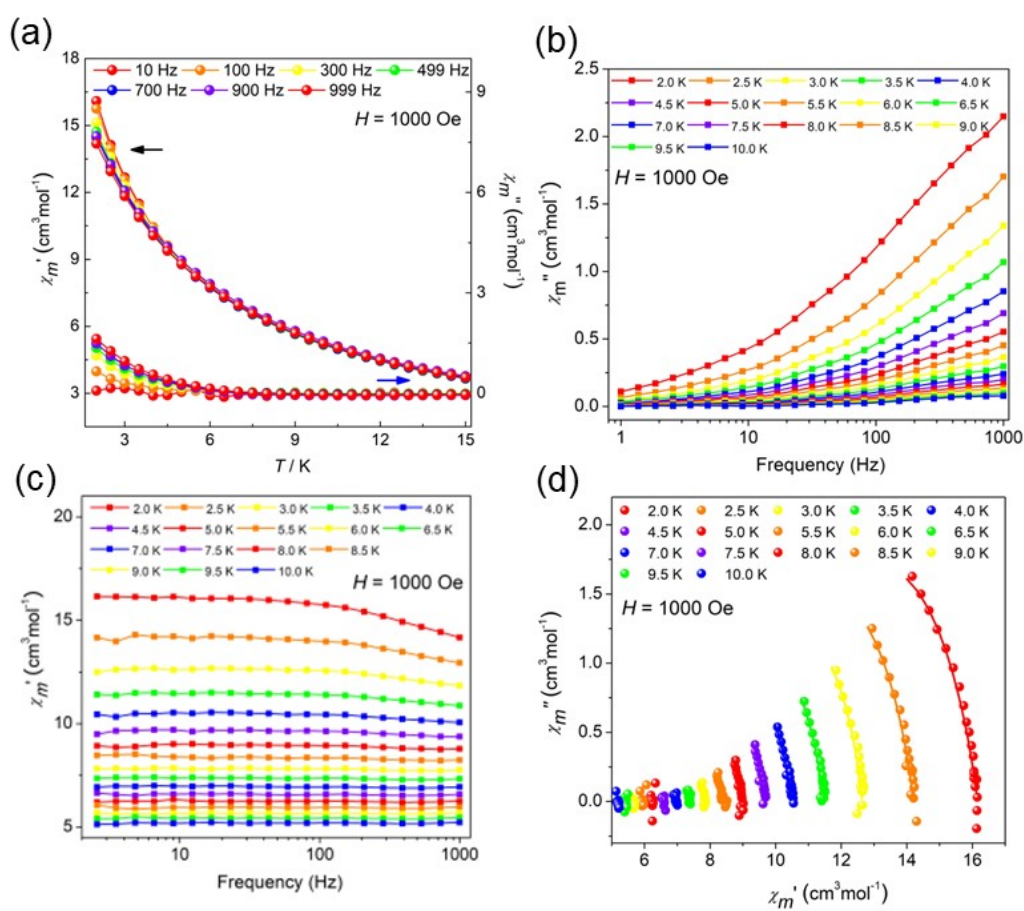

**Figure S7.** Temperature-dependent  $\chi'$  and  $\chi''$  AC susceptibilities under 1000 Oe DC fields for **R-2** (a); Variable-frequency AC susceptibilities ( $H = 1000$  Oe) of cluster **R-2** at different temperatures (b and c) and Cole-Cole plots from AC susceptibilities (d).

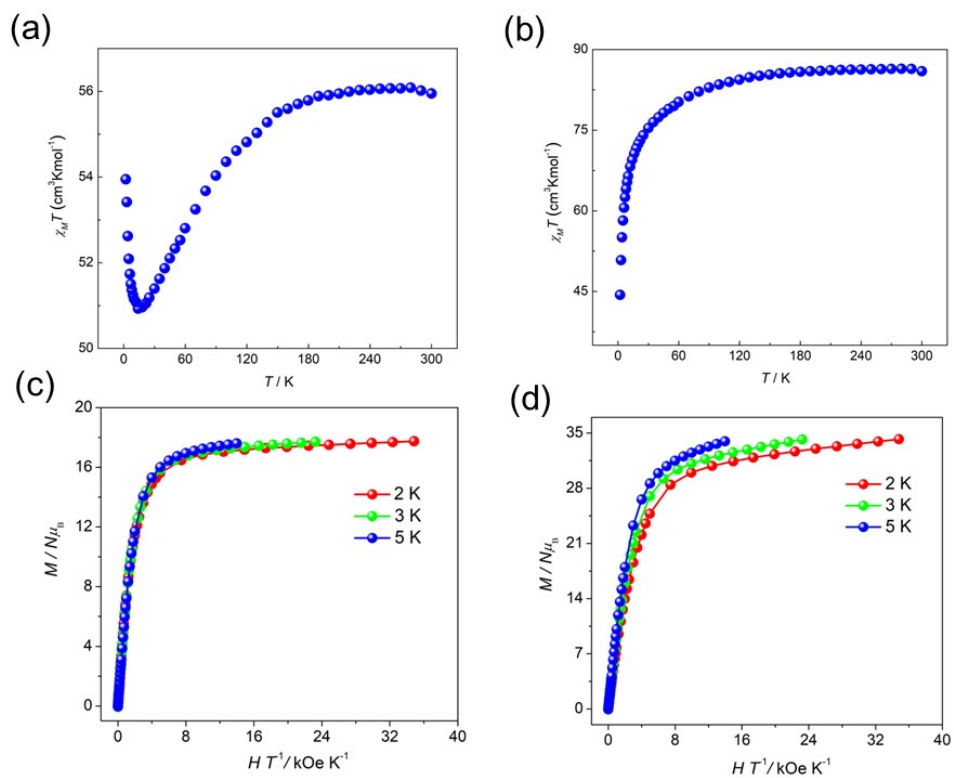

**Figure S8.** Plots of  $\chi_m T$  versus  $T$  for clusters **S-1** and **S-2** (a, b);  $M$  vs.  $H/T$  plots of clusters **S-1** and **S-2** (c, d).

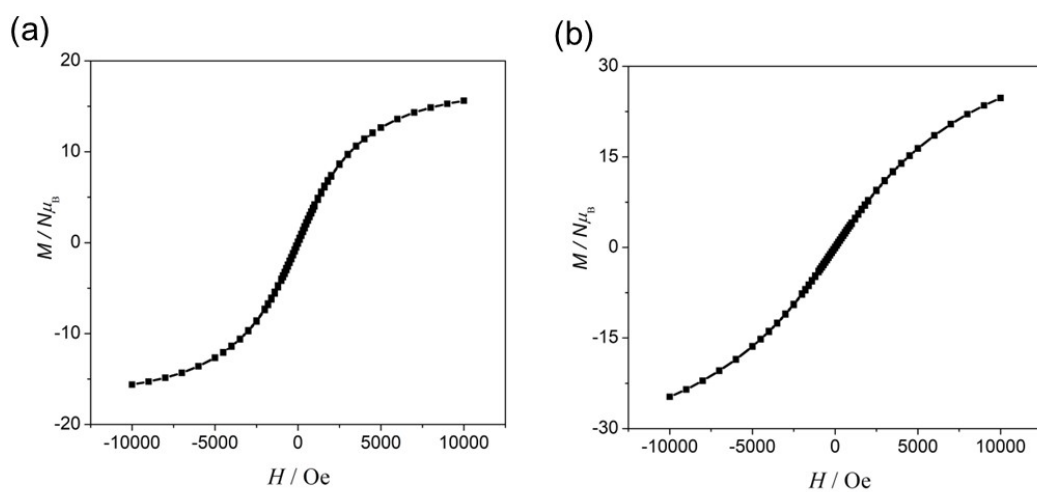

**Figure S9.** Loop curve graph of clusters **S-1** (a) and **S-2** (b) at 2 K.

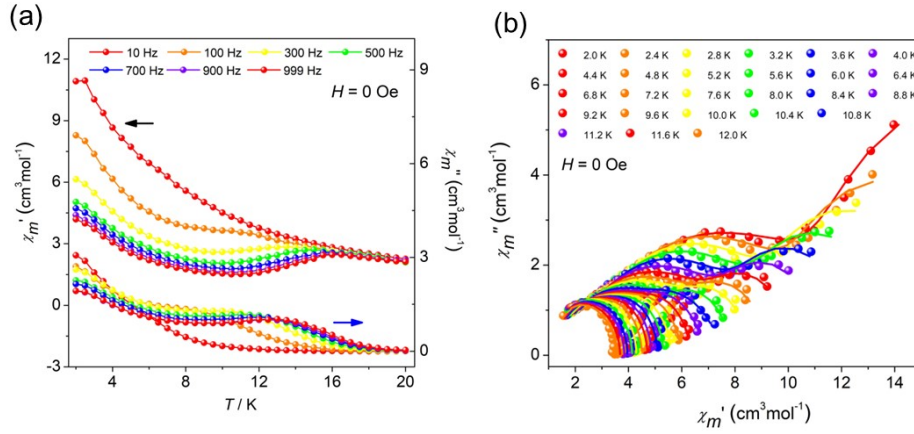

**Figure S10.** Temperature-dependent  $\chi'$  and  $\chi''$  AC susceptibilities under 0 Oe dc fields for **S-1** (a); Cole-Cole plots for **S-1** (b).

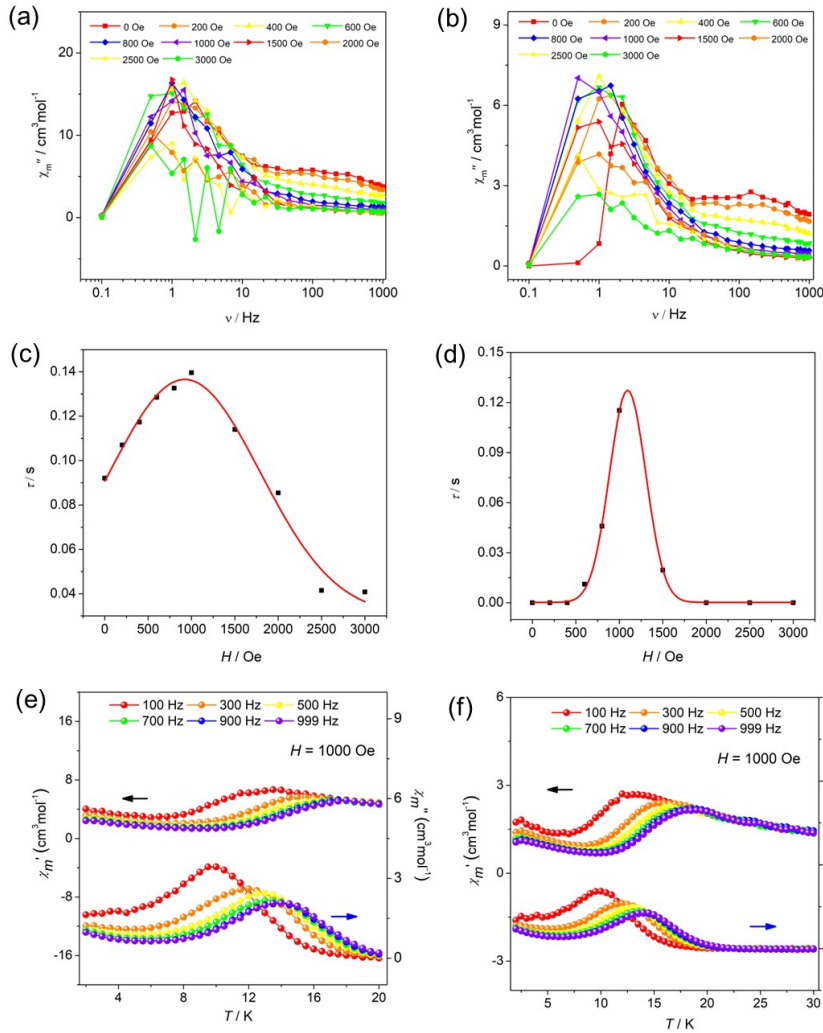

**Figure S11.** Plots of  $\chi''$  vs.  $\nu$  (10–999 Hz) at 2 K under 0–3000 Oe dc field with a 2 Oe oscillating ac field for clusters **R-1** (a) and **S-1** (b); Field-dependence of the relaxation time (squares) and the best fit curve (red line) for **R-1** (c) and **S-1** (d); Temperature-dependent  $\chi'$  and  $\chi''$  AC susceptibilities under 1000 Oe dc fields for **R-1** (e) and **S-1** (f).

## Magnetic analysis of cluster **S-1**.

For the **S-1**, we applied an Orbach relaxation process ( $\tau^{-1} = \tau_0^{-1} \exp(-U_{\text{eff}}/k_B T)$ ) to best fit obtained  $U_{\text{eff}} = 18.64$  K,  $\tau_0 = 8.5 \times 10^{-5}$  s for the FR phase (Figure S12a);  $U_{\text{eff}} = 30.53$  K,  $\tau_0 = 1.12 \times 10^{-4}$  s for the SR phase (Figure S12b), respectively. We considered multinomial relaxation processes ( $\tau^{-1} = \tau_0^{-1} \exp(-U_{\text{eff}}/k_B T) + \tau_{\text{QTM}}^{-1} + CT^n$ ) to fit **S-1** over all of the temperature, and we obtained  $U_{\text{eff}} = 28.52$  K,  $\tau_0 = 6.15 \times 10^{-5}$  s for the FR phase (Figure S12a);  $U_{\text{eff}} = 22.75$  K,  $\tau_0 = 4.43 \times 10^{-4}$  s for the SR phase (Figure S12b), respectively.

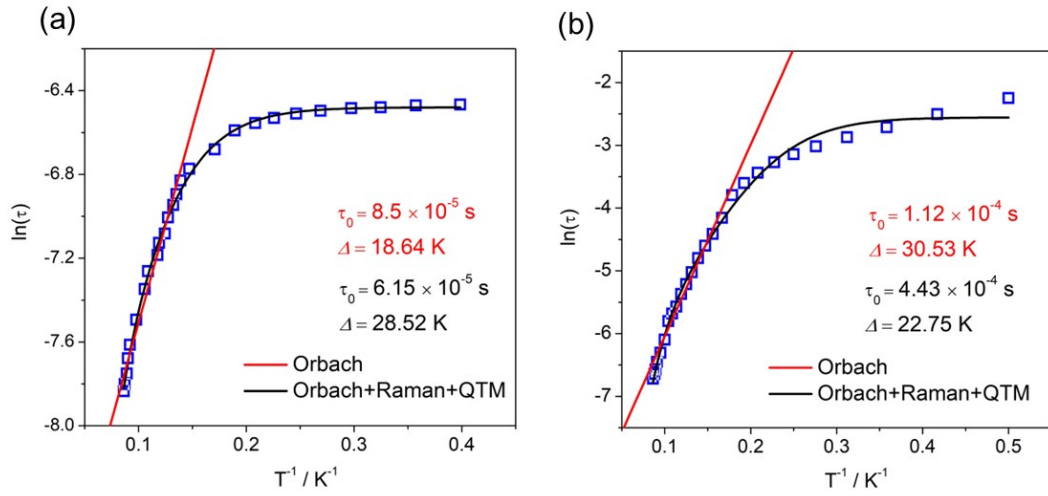

**Figure S12.** Arrhenius plots generated from the temperature-dependent relaxation times extracted from the Cole-Cole fits of the AC susceptibilities for cluster **S-1** under 0 Oe dc field (a and b). Symbols show the extracted times, and the lines are least-squares fits.

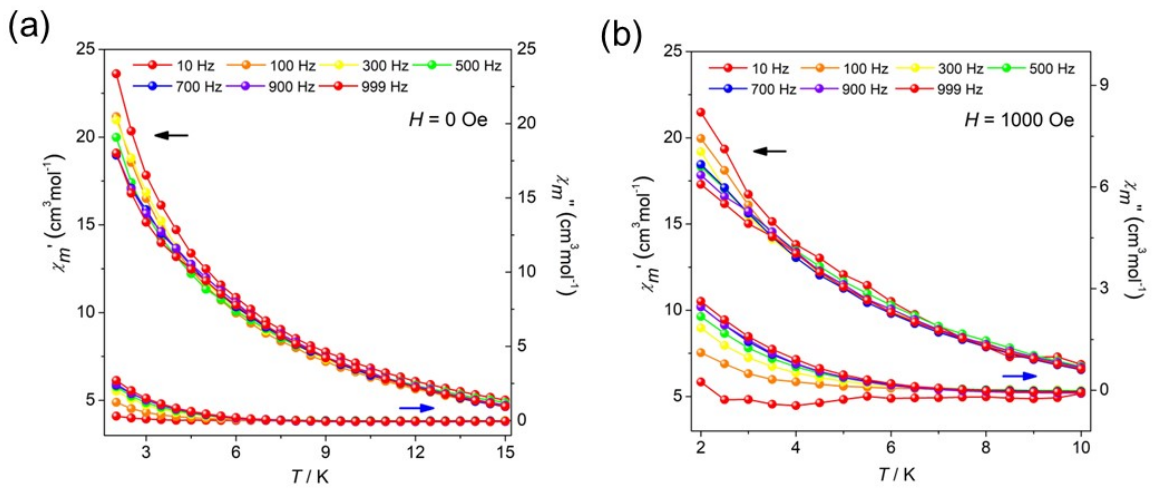

**Figure S13.** Temperature-dependent  $\chi'$  and  $\chi''$  AC susceptibilities under 0 Oe dc fields and 1000 Oe dc fields for **S-2** (a) and (b).

**Table S2.** Selected bond lengths (Å) and angles (°) of cluster *R-1*.

| <b>Bond lengths (Å)</b> |            |                                       |            |                        |            |
|-------------------------|------------|---------------------------------------|------------|------------------------|------------|
| Dy1-O4                  | 2.283(5)   | Dy1-O8                                | 2.414(6)   | Dy1-O6                 | 2.427(5)   |
| Dy1-O4 <sup>i</sup>     | 2.419(5)   | Dy1-O9                                | 2.5128(3)  | Dy1-N4                 | 2.631(7)   |
| Dy1-O8 <sup>ii</sup>    | 2.309(5)   | Dy1-O2                                | 2.402(5)   | Dy1-N2                 | 2.653(6)   |
| <b>Bond angles (°)</b>  |            |                                       |            |                        |            |
| O4-Dy1-O4 <sup>i</sup>  | 76.34(17)  | O8-Dy1-O4 <sup>i</sup>                | 133.55(16) | O9-Dy1-N4              | 129.37(14) |
| O4-Dy1-O8               | 87.40(16)  | O8 <sup>ii</sup> -Dy1-O4 <sup>i</sup> | 85.91(16)  | O9-Dy1-N2              | 128.61(14) |
| O4-Dy1-O8 <sup>ii</sup> | 137.08(17) | O8 <sup>ii</sup> -Dy1-O8              | 77.06(17)  | O2-Dy1-O4 <sup>i</sup> | 75.59(17)  |
| O4-Dy1-O9               | 68.36(12)  | O8 <sup>ii</sup> -Dy1-O9              | 68.73(13)  | O2-Dy1-O8              | 143.68(17) |
| O4 <sup>i</sup> -Dy1-O9 | 66.38(11)  | O8-Dy1-O9                             | 67.17(11)  | O2-Dy1-O9              | 134.98(13) |
| O4-Dy1-O2               | 125.30(17) | O8 <sup>ii</sup> -Dy1-O2              | 85.90(19)  | O2-Dy1-O6              | 89.39(17)  |
| O4-Dy1-O6               | 86.24(18)  | O8-Dy1-O6                             | 76.24(17)  | O2-Dy1-N4              | 64.96(19)  |
| O4 <sup>i</sup> -Dy1-O6 | 143.36(16) | O8 <sup>ii</sup> -Dy1-O6              | 126.78(17) | O2-Dy1-N2              | 61.90(18)  |
| O4-Dy1-N4               | 147.85(19) | O8 <sup>ii</sup> -Dy1-N4              | 67.81(18)  | O6-Dy1-O9              | 135.62(12) |
| O4 <sup>i</sup> -Dy1-N4 | 133.22(18) | O8-Dy1-N4                             | 78.87(18)  | O6-Dy1-N4              | 62.38(18)  |
| O4-Dy1-N2               | 67.28(17)  | O8 <sup>ii</sup> -Dy1-N2              | 146.88(18) | O6-Dy1-N2              | 64.45(19)  |
| O4 <sup>i</sup> -Dy1-N2 | 79.05(17)  | O8-Dy1-N2                             | 133.66(17) | N4-Dy1-N2              | 102.02(19) |

**Table S3.** Selected bond lengths (Å) and angles (°) of cluster *S-1*.

| <b>Bond lengths (Å)</b> |            |                                       |            |                         |            |
|-------------------------|------------|---------------------------------------|------------|-------------------------|------------|
| Dy1-O4                  | 2.281(5)   | Dy1-O8                                | 2.313(5)   | Dy1-O6                  | 2.431(5)   |
| Dy1-O4 <sup>ii</sup>    | 2.424(5)   | Dy1-O2                                | 2.399(5)   | Dy1-N4                  | 2.620(6)   |
| Dy1-O8 <sup>i</sup>     | 2.412(5)   | Dy1-O9                                | 2.5130(3)  | Dy1-N2                  | 2.649(6)   |
| <b>Bond angles (°)</b>  |            |                                       |            |                         |            |
| O4-Dy1-O4 <sup>ii</sup> | 76.42(15)  | O8 <sup>i</sup> -Dy1-O4 <sup>ii</sup> | 133.55(14) | O2-Dy1-O4 <sup>ii</sup> | 75.60(16)  |
| O4-Dy1-O8 <sup>i</sup>  | 87.30(14)  | O8-Dy1-O4 <sup>ii</sup>               | 85.90(14)  | O2-Dy1-O8 <sup>i</sup>  | 143.78(15) |
| O4-Dy1-O8               | 137.09(16) | O8-Dy1-O8 <sup>i</sup>                | 77.09(15)  | O2-Dy1-O9               | 135.03(12) |

|                          |            |                         |            |           |            |
|--------------------------|------------|-------------------------|------------|-----------|------------|
| O4-Dy1-O2                | 125.20(16) | O8-Dy1-O2               | 86.08(17)  | O2-Dy1-O6 | 89.22(16)  |
| O4-Dy1-O9                | 68.43(11)  | O8 <sup>i</sup> -Dy1-O9 | 67.20(11)  | O2-Dy1-N4 | 65.06(17)  |
| O4 <sup>ii</sup> -Dy1-O9 | 66.35(10)  | O8-Dy1-O9               | 68.67(12)  | O2-Dy1-N2 | 61.77(16)  |
| O4-Dy1-O6                | 86.29(17)  | O8 <sup>i</sup> -Dy1-O6 | 76.22(16)  | O9-Dy1-N4 | 129.25(13) |
| O4 <sup>ii</sup> -Dy1-O6 | 143.42(15) | O8-Dy1-O6               | 126.69(16) | O9-Dy1-N2 | 128.74(13) |
| O4 <sup>ii</sup> -Dy1-N4 | 133.19(16) | O8-Dy1-N4               | 67.73(17)  | O6-Dy1-O9 | 135.73(12) |
| O4-Dy1-N4                | 147.84(17) | O8 <sup>i</sup> -Dy1-N4 | 78.86(16)  | O6-Dy1-N4 | 62.35(17)  |
| O4-Dy1-N2                | 67.31(15)  | O8 <sup>i</sup> -Dy1-N2 | 133.50(16) | O6-Dy1-N2 | 64.34(18)  |
| O4 <sup>ii</sup> -Dy1-N2 | 79.22(16)  | O8-Dy1-N2               | 146.97(17) | N4-Dy1-N2 | 102.01(18) |

**Table S4.** Selected bond lengths (Å) and angles (°) of cluster **R-2**.

| Bond lengths (Å) |           |         |           |         |           |
|------------------|-----------|---------|-----------|---------|-----------|
| Dy1-O3           | 2.232(8)  | Dy3-O9  | 2.263(9)  | Dy5-O10 | 2.274(9)  |
| Dy1-O15          | 2.299(9)  | Dy3-O14 | 2.312(9)  | Dy5-O12 | 2.356(11) |
| Dy1-O27          | 2.356(10) | Dy3-O16 | 2.345(12) | Dy5-O37 | 2.365(10) |
| Dy1-O2           | 2.370(8)  | Dy3-O21 | 2.352(9)  | Dy5-O35 | 2.420(19) |
| Dy1-O23          | 2.435(11) | Dy3-O22 | 2.393(10) | Dy5-O36 | 2.433(17) |
| Dy1-O24          | 2.465(11) | Dy3-O13 | 2.402(10) | Dy5-O34 | 2.488(11) |
| Dy1-O26          | 2.493(11) | Dy3-O33 | 2.414(9)  | Dy5-N3  | 2.551(12) |
| Dy1-N1           | 2.563(10) | Dy3-O10 | 2.458(12) | Dy5-O33 | 2.623(15) |
| Dy1-O25          | 2.604(9)  | Dy4-O4  | 2.258(8)  | Dy6-O8  | 2.236(8)  |
| Dy2-O14          | 2.253(10) | Dy4-O9  | 2.326(10) | Dy6-O5  | 2.292(8)  |
| Dy2-O4           | 2.303(8)  | Dy4-O20 | 2.333(9)  | Dy6-O32 | 2.347(10) |
| Dy2-O18          | 2.328(11) | Dy4-O19 | 2.349(10) | Dy6-O7  | 2.400(8)  |
| Dy2-O17          | 2.331(9)  | Dy4-O8  | 2.387(8)  | Dy6-O29 | 2.451(10) |
| Dy2-O22          | 2.399(7)  | Dy4-O22 | 2.389(9)  | Dy6-O28 | 2.452(13) |
| Dy2-O3           | 2.410(8)  | Dy4-O30 | 2.412(8)  | Dy6-O31 | 2.497(9)  |
| Dy2-O25          | 2.419(8)  | Dy4-O5  | 2.464(8)  | Dy6-N5  | 2.567(11) |

|                        |          |             |           |             |          |
|------------------------|----------|-------------|-----------|-------------|----------|
| Dy2-O15                | 2.467(9) | Dy5-O13     | 2.236(11) | Dy6-O30     | 2.608(9) |
| <b>Bond angles (°)</b> |          |             |           |             |          |
| O3-Dy1-O15             | 75.0(3)  | O9-Dy3-O14  | 82.1(3)   | O12-Dy5-O35 | 98.0(7)  |
| O3-Dy1-O27             | 141.9(4) | O9-Dy3-O16  | 146.0(4)  | O37-Dy5-O35 | 134.2(6) |
| O15-Dy1-O27            | 87.0(4)  | O14-Dy3-O16 | 81.5(4)   | O13-Dy5-O36 | 129.2(5) |
| O3-Dy1-O2              | 133.6(3) | O9-Dy3-O21  | 80.8(3)   | O10-Dy5-O36 | 83.5(5)  |
| O15-Dy1-O2             | 150.8(3) | O14-Dy3-O21 | 147.1(4)  | O12-Dy5-O36 | 73.0(5)  |
| O27-Dy1-O2             | 72.5(3)  | O16-Dy3-O21 | 97.6(5)   | O37-Dy5-O36 | 81.3(6)  |
| O3-Dy1-O23             | 79.2(4)  | O9-Dy3-O22  | 70.5(3)   | O35-Dy5-O36 | 53.6(6)  |
| O15-Dy1-O23            | 80.6(4)  | O14-Dy3-O22 | 69.4(3)   | O13-Dy5-O34 | 80.2(4)  |
| O27-Dy1-O23            | 131.3(5) | O16-Dy3-O22 | 75.9(4)   | O10-Dy5-O34 | 118.8(4) |
| O2-Dy1-O23             | 97.3(4)  | O21-Dy3-O22 | 78.5(3)   | O12-Dy5-O34 | 78.0(5)  |
| O3-Dy1-O24             | 130.0(4) | O9-Dy3-O13  | 111.1(3)  | O37-Dy5-O34 | 79.4(4)  |
| O15-Dy1-O24            | 83.8(3)  | O14-Dy3-O13 | 68.0(3)   | O35-Dy5-O34 | 144.1(5) |
| O27-Dy1-O24            | 79.3(4)  | O16-Dy3-O13 | 89.8(5)   | O36-Dy5-O34 | 148.8(4) |
| O2-Dy1-O24             | 72.3(3)  | O21-Dy3-O13 | 144.8(4)  | O13-Dy5-N3  | 70.8(4)  |
| O23-Dy1-O24            | 52.7(5)  | O22-Dy3-O13 | 136.5(3)  | O10-Dy5-N3  | 141.1(4) |
| O3-Dy1-O26             | 80.5(3)  | O9-Dy3-O33  | 133.2(4)  | O12-Dy5-N3  | 65.1(4)  |
| O15-Dy1-O26            | 118.6(4) | O14-Dy3-O33 | 131.1(3)  | O37-Dy5-N3  | 133.2(4) |
| O27-Dy1-O26            | 79.2(4)  | O16-Dy3-O33 | 78.8(4)   | O35-Dy5-N3  | 73.6(5)  |
| O2-Dy1-O26             | 78.5(3)  | O21-Dy3-O33 | 80.0(4)   | O36-Dy5-N3  | 104.6(6) |
| O23-Dy1-O26            | 147.0(4) | O22-Dy3-O33 | 144.1(4)  | O34-Dy5-N3  | 72.5(4)  |
| O24-Dy1-O26            | 147.9(3) | O13-Dy3-O33 | 67.7(4)   | O13-Dy5-O33 | 66.5(4)  |
| O3-Dy1-N1              | 70.4(3)  | O9-Dy3-O10  | 68.0(3)   | O10-Dy5-O33 | 68.0(4)  |
| O15-Dy1-N1             | 141.1(3) | O14-Dy3-O10 | 111.8(4)  | O12-Dy5-O33 | 122.7(5) |
| O27-Dy1-N1             | 131.6(3) | O16-Dy3-O10 | 145.9(4)  | O37-Dy5-O33 | 73.6(4)  |
| O2-Dy1-N1              | 64.0(3)  | O21-Dy3-O10 | 87.2(4)   | O35-Dy5-O33 | 138.0(6) |
| O23-Dy1-N1             | 76.1(4)  | O22-Dy3-O10 | 137.8(3)  | O36-Dy5-O33 | 143.1(5) |



|             |          |             |          |             |          |
|-------------|----------|-------------|----------|-------------|----------|
| O24-Dy1-N1  | 105.3(4) | O13-Dy3-O10 | 68.6(4)  | O34-Dy5-O33 | 50.8(3)  |
| O26-Dy1-N1  | 72.7(3)  | O33-Dy3-O10 | 68.8(4)  | N3-Dy5-O33  | 112.3(4) |
| O3-Dy1-O25  | 67.4(3)  | O4-Dy4-O9   | 82.3(3)  | O8-Dy6-O5   | 74.0(3)  |
| O15-Dy1-O25 | 68.0(3)  | O4-Dy4-O20  | 147.1(3) | O8-Dy6-O32  | 140.6(3) |
| O27-Dy1-O25 | 74.8(3)  | O9-Dy4-O20  | 80.0(3)  | O5-Dy6-O32  | 86.0(4)  |
| O2-Dy1-O25  | 123.4(3) | O4-Dy4-O19  | 82.5(3)  | O8-Dy6-O7   | 133.9(3) |
| O23-Dy1-O25 | 138.6(4) | O9-Dy4-O19  | 146.5(3) | O5-Dy6-O7   | 151.7(3) |
| O24-Dy1-O25 | 142.2(3) | O20-Dy4-O19 | 97.5(4)  | O32-Dy6-O7  | 73.6(4)  |
| O26-Dy1-O25 | 50.6(3)  | O4-Dy4-O8   | 112.2(3) | O8-Dy6-O29  | 129.9(4) |
| N1-Dy1-O25  | 112.4(3) | O9-Dy4-O8   | 68.1(3)  | O5-Dy6-O29  | 84.3(3)  |
| O14-Dy2-O4  | 82.6(3)  | O20-Dy4-O8  | 86.3(3)  | O32-Dy6-O29 | 79.6(4)  |
| O14-Dy2-O18 | 146.1(3) | O19-Dy4-O8  | 145.4(3) | O7-Dy6-O29  | 73.0(3)  |
| O4-Dy2-O18  | 80.5(3)  | O4-Dy4-O22  | 70.2(3)  | O8-Dy6-O28  | 79.5(4)  |
| O14-Dy2-O17 | 82.6(4)  | O9-Dy4-O22  | 69.6(3)  | O5-Dy6-O28  | 83.5(4)  |
| O4-Dy2-O17  | 145.9(3) | O20-Dy4-O22 | 77.6(3)  | O32-Dy6-O28 | 132.3(4) |
| O18-Dy2-O17 | 95.4(4)  | O19-Dy4-O22 | 77.2(3)  | O7-Dy6-O28  | 95.7(4)  |
| O14-Dy2-O22 | 70.2(3)  | O8-Dy4-O22  | 136.6(3) | O29-Dy6-O28 | 53.2(5)  |
| O4-Dy2-O22  | 69.3(3)  | O4-Dy4-O30  | 133.2(3) | O8-Dy6-O31  | 81.2(3)  |
| O18-Dy2-O22 | 76.4(4)  | O9-Dy4-O30  | 132.4(3) | O5-Dy6-O31  | 119.6(3) |
| O17-Dy2-O22 | 76.8(3)  | O20-Dy4-O30 | 78.0(3)  | O32-Dy6-O31 | 79.8(3)  |
| O14-Dy2-O3  | 111.6(3) | O19-Dy4-O30 | 78.3(3)  | O7-Dy6-O31  | 76.6(3)  |
| O4-Dy2-O3   | 67.9(3)  | O8-Dy4-O30  | 68.8(3)  | O29-Dy6-O31 | 147.0(3) |
| O18-Dy2-O3  | 88.8(4)  | O22-Dy4-O30 | 142.6(3) | O28-Dy6-O31 | 144.0(4) |
| O17-Dy2-O3  | 146.1(3) | O4-Dy4-O5   | 68.8(3)  | O8-Dy6-N5   | 70.8(3)  |
| O22-Dy2-O3  | 136.5(3) | O9-Dy4-O5   | 111.3(3) | O5-Dy6-N5   | 139.9(3) |
| O14-Dy2-O25 | 132.7(3) | O20-Dy4-O5  | 143.9(3) | O32-Dy6-N5  | 133.8(4) |
| O4-Dy2-O25  | 131.5(3) | O19-Dy4-O5  | 90.4(3)  | O7-Dy6-N5   | 64.3(3)  |
| O18-Dy2-O25 | 79.3(3)  | O8-Dy4-O5   | 68.3(3)  | O29-Dy6-N5  | 104.2(4) |

|             |          |             |          |             |          |
|-------------|----------|-------------|----------|-------------|----------|
| O17-Dy2-O25 | 79.8(3)  | O22-Dy4-O5  | 138.4(2) | O28-Dy6-N5  | 72.0(5)  |
| O22-Dy2-O25 | 144.2(3) | O30-Dy4-O5  | 69.2(3)  | O31-Dy6-N5  | 73.1(3)  |
| O3-Dy2-O25  | 68.0(3)  | O13-Dy5-O10 | 74.8(4)  | O8-Dy6-O30  | 67.6(3)  |
| O14-Dy2-O15 | 68.1(3)  | O13-Dy5-O12 | 134.8(4) | O5-Dy6-O30  | 68.5(3)  |
| O4-Dy2-O15  | 112.1(3) | O10-Dy5-O12 | 150.0(4) | O32-Dy6-O30 | 73.6(3)  |
| O18-Dy2-O15 | 145.8(3) | O13-Dy5-O37 | 139.7(5) | O7-Dy6-O30  | 121.8(3) |
| O17-Dy2-O15 | 90.3(4)  | O10-Dy5-O37 | 85.3(4)  | O29-Dy6-O30 | 142.6(3) |
| O22-Dy2-O15 | 137.5(3) | O12-Dy5-O37 | 73.1(4)  | O28-Dy6-O30 | 141.2(4) |
| O3-Dy2-O15  | 68.9(3)  | O13-Dy5-O35 | 78.0(6)  | O31-Dy6-O30 | 51.1(3)  |
| O25-Dy2-O15 | 68.6(3)  | O10-Dy5-O35 | 82.1(6)  | N5-Dy6-O30  | 113.2(3) |

**Table S5.** Selected bond lengths (Å) and angles (°) of cluster **S-2**.

| Bond lengths (Å) |           |         |           |         |           |
|------------------|-----------|---------|-----------|---------|-----------|
| Dy1-O15          | 2.299(10) | Dy3-O29 | 2.415(8)  | Dy5-O8  | 2.241(8)  |
| Dy1-O23          | 2.620(10) | Dy3-O9  | 2.319(10) | Dy5-O30 | 2.440(14) |
| Dy1-O3           | 2.240(9)  | Dy3-O21 | 2.332(10) | Dy5-O5  | 2.290(9)  |
| Dy1-O25          | 2.436(12) | Dy3-O8  | 2.390(9)  | Dy5-O32 | 2.343(11) |
| Dy1-O24          | 2.483(11) | Dy3-O22 | 2.382(9)  | Dy5-O7  | 2.386(9)  |
| Dy1-O26          | 2.458(12) | Dy3-O4  | 2.257(9)  | Dy5-O31 | 2.459(11) |
| Dy1-O2           | 2.374(8)  | Dy3-O16 | 2.351(11) | Dy5-N3  | 2.571(11) |
| Dy1-O27          | 2.352(10) | Dy3-O5  | 2.456(9)  | Dy5-O28 | 2.487(10) |
| Dy1-N2           | 2.565(11) | Dy4-O14 | 2.311(10) | Dy6-O12 | 2.357(12) |
| Dy2-O17          | 2.340(11) | Dy4-O9  | 2.261(10) | Dy6-O13 | 2.223(11) |
| Dy2-O14          | 2.244(10) | Dy4-O13 | 2.411(11) | Dy6-O10 | 2.279(10) |
| Dy2-O15          | 2.467(11) | Dy4-O22 | 2.392(11) | Dy6-O33 | 2.482(12) |
| Dy2-O22          | 2.395(7)  | Dy4-O10 | 2.457(13) | Dy6-O37 | 2.355(11) |
| Dy2-O4           | 2.309(9)  | Dy4-O19 | 2.353(13) | Dy6-O34 | 2.633(15) |
| Dy2-O23          | 2.408(8)  | Dy4-O20 | 2.357(11) | Dy6-O36 | 2.423(17) |

|                        |           |             |           |             |           |
|------------------------|-----------|-------------|-----------|-------------|-----------|
| Dy2-O3                 | 2.405(9)  | Dy4-O34     | 2.416(10) | Dy6-N5      | 2.548(12) |
| Dy2-O18                | 2.332(11) | Dy5-O29     | 2.596(10) | Dy6-O35     | 2.437(19) |
| <b>Bond angles (°)</b> |           |             |           |             |           |
| O15-Dy1-O23            | 67.6(4)   | O29-Dy3-O5  | 68.8(3)   | O30-Dy5-O29 | 141.5(4)  |
| O15-Dy1-O25            | 81.4(5)   | O9-Dy3-O29  | 132.7(3)  | O30-Dy5-O31 | 52.9(5)   |
| O15-Dy1-O24            | 118.1(4)  | O9-Dy3-O21  | 79.8(3)   | O30-Dy5-N3  | 72.2(5)   |
| O15-Dy1-O26            | 83.8(4)   | O9-Dy3-O8   | 68.3(3)   | O30-Dy5-O28 | 144.2(5)  |
| O15-Dy1-O2             | 150.7(3)  | O9-Dy3-O22  | 69.3(3)   | O5-Dy5-O29  | 68.2(3)   |
| O15-Dy1-O27            | 86.4(4)   | O9-Dy3-O16  | 146.2(3)  | O5-Dy5-O30  | 83.8(5)   |
| O15-Dy1-N2             | 141.6(3)  | O9-Dy3-O5   | 111.3(3)  | O5-Dy5-O32  | 86.3(4)   |
| O3-Dy1-O15             | 75.1(3)   | O21-Dy3-O29 | 78.6(3)   | O5-Dy5-O7   | 152.1(3)  |
| O3-Dy1-O23             | 67.2(3)   | O21-Dy3-O8  | 85.9(4)   | O5-Dy5-O31  | 84.6(3)   |
| O3-Dy1-O25             | 79.4(5)   | O21-Dy3-O22 | 77.8(3)   | O5-Dy5-N3   | 139.8(4)  |
| O3-Dy1-O24             | 80.5(3)   | O21-Dy3-O16 | 98.0(4)   | O5-Dy5-O28  | 119.5(3)  |
| O3-Dy1-O26             | 129.6(4)  | O21-Dy3-O5  | 143.9(3)  | O32-Dy5-O29 | 73.4(3)   |
| O3-Dy1-O2              | 133.6(3)  | O8-Dy3-O29  | 68.6(3)   | O32-Dy5-O30 | 132.3(5)  |
| O3-Dy1-O27             | 141.8(4)  | O8-Dy3-O5   | 68.4(3)   | O32-Dy5-O7  | 73.4(4)   |
| O3-Dy1-N2              | 70.5(3)   | O22-Dy3-O29 | 143.1(3)  | O32-Dy5-O31 | 79.8(4)   |
| O25-Dy1-O23            | 138.8(4)  | O22-Dy3-O8  | 136.5(3)  | O32-Dy5-N3  | 133.6(4)  |
| O25-Dy1-O24            | 146.9(5)  | O22-Dy3-O5  | 138.3(3)  | O32-Dy5-O28 | 79.4(4)   |
| O25-Dy1-O26            | 52.2(5)   | O4-Dy3-O29  | 132.8(3)  | O7-Dy5-O29  | 121.5(3)  |
| O25-Dy1-N2             | 76.0(5)   | O4-Dy3-O9   | 82.1(3)   | O7-Dy5-O30  | 95.7(5)   |
| O24-Dy1-O23            | 50.5(3)   | O4-Dy3-O21  | 147.1(3)  | O7-Dy5-O31  | 73.3(3)   |
| O24-Dy1-N2             | 72.6(4)   | O4-Dy3-O8   | 112.4(3)  | O7-Dy5-N3   | 64.3(3)   |
| O26-Dy1-O23            | 142.4(4)  | O4-Dy3-O22  | 70.2(3)   | O7-Dy5-O28  | 76.1(3)   |
| O26-Dy1-O24            | 148.3(4)  | O4-Dy3-O16  | 82.3(4)   | O31-Dy5-O29 | 142.5(4)  |
| O26-Dy1-N2             | 105.3(4)  | O4-Dy3-O5   | 68.7(3)   | O31-Dy5-N3  | 104.4(4)  |
| O2-Dy1-O23             | 123.3(3)  | O16-Dy3-O29 | 78.5(3)   | O31-Dy5-O28 | 146.7(3)  |

|             |          |             |          |             |          |
|-------------|----------|-------------|----------|-------------|----------|
| O2-Dy1-O25  | 97.0(5)  | O16-Dy3-O8  | 145.5(3) | N3-Dy5-O29  | 113.1(3) |
| O2-Dy1-O24  | 78.5(4)  | O16-Dy3-O22 | 77.2(4)  | O28-Dy5-O29 | 51.3(3)  |
| O2-Dy1-O26  | 72.7(4)  | O16-Dy3-O5  | 90.5(4)  | O28-Dy5-N3  | 72.9(4)  |
| O2-Dy1-N2   | 63.9(3)  | O14-Dy4-O13 | 68.5(3)  | O12-Dy6-O33 | 78.2(5)  |
| O27-Dy1-O23 | 74.9(4)  | O14-Dy4-O22 | 69.0(3)  | O12-Dy6-O34 | 123.0(5) |
| O27-Dy1-O25 | 131.1(5) | O14-Dy4-O10 | 112.0(4) | O12-Dy6-O36 | 72.8(6)  |
| O27-Dy1-O24 | 79.3(4)  | O14-Dy4-O19 | 81.7(4)  | O12-Dy6-N5  | 65.2(4)  |
| O27-Dy1-O26 | 79.6(4)  | O14-Dy4-O20 | 147.0(4) | O12-Dy6-O35 | 97.9(7)  |
| O27-Dy1-O2  | 72.6(4)  | O14-Dy4-O34 | 131.6(3) | O13-Dy6-O12 | 134.8(4) |
| O27-Dy1-N2  | 131.7(4) | O9-Dy4-O14  | 81.9(3)  | O13-Dy6-O10 | 74.9(4)  |
| N2-Dy1-O23  | 112.3(4) | O9-Dy4-O13  | 111.2(4) | O13-Dy6-O33 | 80.2(4)  |
| O17-Dy2-O15 | 145.8(4) | O9-Dy4-O22  | 70.1(3)  | O13-Dy6-O37 | 140.3(5) |
| O17-Dy2-O22 | 76.4(4)  | O9-Dy4-O10  | 68.2(3)  | O13-Dy6-O34 | 66.7(4)  |
| O17-Dy2-O23 | 79.1(4)  | O9-Dy4-O19  | 145.6(4) | O13-Dy6-O36 | 129.5(5) |
| O17-Dy2-O3  | 88.9(4)  | O9-Dy4-O20  | 81.1(3)  | O13-Dy6-N5  | 70.6(4)  |
| O14-Dy2-O17 | 146.0(4) | O9-Dy4-O34  | 133.4(4) | O13-Dy6-O35 | 77.7(6)  |
| O14-Dy2-O15 | 68.2(3)  | O13-Dy4-O10 | 68.4(4)  | O10-Dy6-O12 | 149.9(4) |
| O14-Dy2-O22 | 70.1(4)  | O13-Dy4-O34 | 67.8(4)  | O10-Dy6-O33 | 118.9(5) |
| O14-Dy2-O4  | 82.6(3)  | O22-Dy4-O13 | 136.7(3) | O10-Dy6-O37 | 85.2(4)  |
| O14-Dy2-O23 | 133.0(3) | O22-Dy4-O10 | 137.5(3) | O10-Dy6-O34 | 67.9(4)  |
| O14-Dy2-O3  | 111.5(4) | O22-Dy4-O34 | 144.0(4) | O10-Dy6-O36 | 83.3(5)  |
| O14-Dy2-O18 | 82.3(4)  | O19-Dy4-O13 | 90.3(5)  | O10-Dy6-N5  | 140.9(4) |
| O22-Dy2-O15 | 137.5(4) | O19-Dy4-O22 | 75.9(4)  | O10-Dy6-O35 | 81.9(6)  |
| O22-Dy2-O23 | 144.0(3) | O19-Dy4-O10 | 146.2(4) | O33-Dy6-O34 | 51.0(3)  |
| O22-Dy2-O3  | 136.0(3) | O19-Dy4-O20 | 97.0(5)  | O33-Dy6-N5  | 72.6(4)  |
| O4-Dy2-O17  | 80.6(4)  | O19-Dy4-O34 | 78.8(5)  | O37-Dy6-O12 | 73.1(4)  |
| O4-Dy2-O15  | 112.4(4) | O20-Dy4-O13 | 144.5(4) | O37-Dy6-O33 | 80.1(4)  |
| O4-Dy2-O22  | 69.1(3)  | O20-Dy4-O22 | 78.6(4)  | O37-Dy6-O34 | 74.1(4)  |

|             |          |             |          |             |          |
|-------------|----------|-------------|----------|-------------|----------|
| O4-Dy2-O23  | 131.6(3) | O20-Dy4-O10 | 87.5(5)  | O37-Dy6-O36 | 80.1(6)  |
| O4-Dy2-O3   | 67.6(3)  | O20-Dy4-O34 | 79.5(4)  | O37-Dy6-N5  | 133.6(4) |
| O4-Dy2-O18  | 145.9(3) | O34-Dy4-O10 | 69.0(4)  | O37-Dy6-O35 | 133.5(6) |
| O23-Dy2-O15 | 68.7(4)  | O8-Dy5-O29  | 67.6(3)  | O36-Dy6-O33 | 148.6(4) |
| O3-Dy2-O15  | 69.2(3)  | O8-Dy5-O30  | 79.9(4)  | O36-Dy6-O34 | 142.5(5) |
| O3-Dy2-O23  | 68.5(3)  | O8-Dy5-O5   | 73.9(3)  | O36-Dy6-N5  | 105.0(6) |
| O18-Dy2-O17 | 95.5(4)  | O8-Dy5-O32  | 140.5(4) | O36-Dy6-O35 | 54.1(6)  |
| O18-Dy2-O15 | 89.9(4)  | O8-Dy5-O7   | 133.6(3) | N5-Dy6-O34  | 112.5(4) |
| O18-Dy2-O22 | 77.0(4)  | O8-Dy5-O31  | 130.1(4) | O35-Dy6-O33 | 144.1(5) |
| O18-Dy2-O23 | 79.7(4)  | O8-Dy5-N3   | 70.5(3)  | O35-Dy6-O34 | 137.9(6) |
| O18-Dy2-O3  | 146.5(3) | O8-Dy5-O28  | 81.3(3)  | O35-Dy6-N5  | 73.6(5)  |

**Table S6.** *SHAPE* analysis of the Dy(III) in cluster **R-1**.

| <b>Label</b> | <b>Shape</b> | <b>Symmetry</b>               | <b>Distortion (°)</b><br><b>Dy1</b> |
|--------------|--------------|-------------------------------|-------------------------------------|
| EP-9         | $D_{9h}$     | Enneagon                      | 31.276                              |
| OPY-9        | $C_{8v}$     | Octagonal pyramid             | 22.208                              |
| HBPY-9       | $D_{7h}$     | Heptagonal bipyramid          | 17.232                              |
| JTC-9        | $C_{3v}$     | Triangular cupola J3          | 13.715                              |
| JCCU-9       | $C_{4v}$     | Capped cube (J8)              | 6.443                               |
| CCU-9        | $C_4$        | Capped cube                   | 5.697                               |
| JCSAPR-9     | $C_{4v}$     | Capped sq. antiprism          | 1.838                               |
| CSAPR-9      | $C_{4v}$     | Capped square antiprism       | 1.251                               |
| JTCTPR-9     | $D_{3h}$     | Tricapped trigonal prism J51  | 2.101                               |
| TCTPR-9      | $D_{3h}$     | Tricapped trigonal prism      | 2.639                               |
| JTDIC-9      | $C_{3v}$     | Tridiminished icosahedron J63 | 13.695                              |
| HH-9         | $C_{2v}$     | Hula-hoop                     | 10.544                              |
| MFF-9        | $C_s$        | Muffin                        | 1.910                               |

**Table S7.** *SHAPE* analysis of the Dy(III) in cluster **S-1**.

| Label    | Shape    | Symmetry                      | Distortion (°) |
|----------|----------|-------------------------------|----------------|
|          |          |                               | Dy1            |
| EP-9     | $D_{9h}$ | Enneagon                      | 31.265         |
| OPY-9    | $C_{8v}$ | Octagonal pyramid             | 22.215         |
| HBPY-9   | $D_{7h}$ | Heptagonal bipyramid          | 17.189         |
| JTC-9    | $C_{3v}$ | Triangular cupola J3          | 13.721         |
| JCCU-9   | $C_{4v}$ | Capped cube (J8)              | 6.410          |
| CCU-9    | $C_4$    | Capped cube                   | 5.651          |
| JCSAPR-9 | $C_{4v}$ | Capped sq. antiprism          | 1.854          |
| CSAPR-9  | $C_{4v}$ | Capped square antiprism       | 1.257          |
| JTCTPR-9 | $D_{3h}$ | Tricapped trigonal prism J51  | 2.127          |
| TCTPR-9  | $D_{3h}$ | Tricapped trigonal prism      | 2.635          |
| JTDIC-9  | $C_{3v}$ | Tridiminished icosahedron J63 | 13.725         |
| HH-9     | $C_{2v}$ | Hula-hoop                     | 10.488         |
| MFF-9    | $C_s$    | Muffin                        | 1.918          |

**Table S8.** *SHAPE* analysis of the Dy(III) in cluster **R-2**.

| Label    | Shape    | Symmetry                     | Distortion (°) |        |        |
|----------|----------|------------------------------|----------------|--------|--------|
|          |          |                              | Dy1            | Dy5    | Dy6    |
| EP-9     | $D_{9h}$ | Enneagon                     | 35.677         | 35.638 | 35.343 |
| OPY-9    | $C_{8v}$ | Octagonal pyramid            | 20.504         | 20.900 | 21.066 |
| HBPY-9   | $D_{7h}$ | Heptagonal bipyramid         | 17.995         | 17.880 | 18.750 |
| JTC-9    | $C_{3v}$ | Triangular cupola J3         | 15.084         | 15.463 | 15.299 |
| JCCU-9   | $C_{4v}$ | Capped cube (J8)             | 10.650         | 10.149 | 10.407 |
| CCU-9    | $C_4$    | Capped cube                  | 9.947          | 9.873  | 9.580  |
| JCSAPR-9 | $C_{4v}$ | Capped sq. antiprism         | 2.073          | 1.910  | 2.008  |
| CSAPR-9  | $C_{4v}$ | Capped square antiprism      | 1.739          | 1.611  | 1.674  |
| JTCTPR-9 | $D_{3h}$ | Tricapped trigonal prism J51 | 3.108          | 3.085  | 3.045  |

| TCTPR-9  | $D_{3h}$ | Tricapped trigonal prism                     | 2.473          | 2.463  | 2.415  |
|----------|----------|----------------------------------------------|----------------|--------|--------|
| JTDIC-9  | $C_{3v}$ | Tridiminished icosahedron J63                | 11.714         | 12.421 | 12.310 |
| HH-9     | $C_{2v}$ | Hula-hoop                                    | 10.435         | 10.725 | 10.769 |
| MFF-9    | $C_s$    | Muffin                                       | 1.947          | 1.740  | 1.718  |
| Label    | Shape    | Symmetry                                     | Distortion (°) |        |        |
|          |          |                                              | Dy2            | Dy3    | Dy4    |
| OP-8     | $D_{8h}$ | Octagon                                      | 29.895         | 29.507 | 29.596 |
| HPY-8    | $C_{7v}$ | Heptagonal pyramid                           | 23.516         | 23.546 | 23.590 |
| HBPY-8   | $D_{6h}$ | Hexagonal bipyramid                          | 16.376         | 15.905 | 16.049 |
| CU-8     | $O_h$    | Cube                                         | 12.862         | 12.534 | 12.399 |
| SAPR-8   | $D_{4d}$ | Square antiprism                             | 2.644          | 2.423  | 2.295  |
| TDD-8    | $D_{2d}$ | Triangular dodecahedron                      | 2.198          | 2.083  | 2.019  |
| JGBF-8   | $D_{2d}$ | Johnson-Gyrobifastigium (J26)                | 13.118         | 13.381 | 12.966 |
| JETBPY-8 | $D_{3h}$ | Johnson-Elongated triangular bipyramid (J14) | 27.665         | 27.999 | 28.239 |
| JBTP-8   | $C_{2v}$ | Johnson-Biaugmented trigonal prism (J50)     | 2.124          | 2.190  | 2.095  |
| BTPR-8   | $C_{2v}$ | Biaugmented trigonal prism                   | 1.672          | 1.716  | 1.625  |
| JSD-8    | $D_{2d}$ | Snub disphenoid (J84)                        | 3.981          | 4.006  | 4.041  |
| TT-8     | $T_d$    | Triakis tetrahedron                          | 13.565         | 13.308 | 13.083 |
| ETBPY-8  | $D_{3h}$ | Elongated trigonal bipyramid                 | 24.777         | 24.417 | 24.196 |

**Table S9.** SHAPE analysis of the Dy(III) in cluster **S-2**.

| Label  | Shape    | Symmetry             | Distortion (°) |        |        |
|--------|----------|----------------------|----------------|--------|--------|
|        |          |                      | Dy1            | Dy5    | Dy6    |
| EP-9   | $D_{9h}$ | Enneagon             | 35.497         | 35.314 | 35.505 |
| OPY-9  | $C_{8v}$ | Octagonal pyramid    | 20.628         | 21.020 | 21.014 |
| HBPY-9 | $D_{7h}$ | Heptagonal bipyramid | 17.936         | 18.806 | 18.042 |
| JTC-9  | $C_{3v}$ | Triangular cupola J3 | 15.120         | 15.211 | 15.323 |

|          |          |                              |        |        |        |
|----------|----------|------------------------------|--------|--------|--------|
| JCCU-9   | $C_{4v}$ | Capped cube (J8)             | 10.694 | 10.386 | 10.218 |
| CCU-9    | $C_4$    | Capped cube                  | 9.890  | 9.532  | 9.983  |
| JCSAPR-9 | $C_{4v}$ | Capped sq. antiprism         | 2.099  | 2.042  | 1.853  |
| CSAPR-9  | $C_{4v}$ | Capped square antiprism      | 1.800  | 1.696  | 1.593  |
| JTCTPR-9 | $D_{3h}$ | Tricapped trigonal prism J51 | 3.129  | 3.012  | 3.027  |
| TCTPR-9  | $D_{3h}$ | Tricapped trigonal prism     | 2.546  | 2.403  | 2.427  |
| JTDIC-9  | $C_{3v}$ | Tridiminshed icosahedron J63 | 11.827 | 12.208 | 12.361 |
| HH-9     | $C_{2v}$ | Hula-hoop                    | 10.454 | 10.742 | 10.777 |
| MFF-9    | $C_s$    | Muffin                       | 1.983  | 1.745  | 1.723  |

| Label    | Shape    | Symmetry                                        | Distortion (°) |        |        |
|----------|----------|-------------------------------------------------|----------------|--------|--------|
|          |          |                                                 | Dy2            | Dy3    | Dy4    |
| OP-8     | $D_{8h}$ | Octagon                                         | 29.871         | 29.410 | 29.665 |
| HPY-8    | $C_{7v}$ | Heptagonal pyramid                              | 23.539         | 23.641 | 23.693 |
| HBPY-8   | $D_{6h}$ | Hexagonal bipyramid                             | 16.404         | 16.010 | 15.838 |
| CU-8     | $O_h$    | Cube                                            | 12.858         | 12.349 | 12.489 |
| SAPR-8   | $D_{4d}$ | Square antiprism                                | 2.619          | 2.291  | 2.475  |
| TDD-8    | $D_{2d}$ | Triangular dodecahedron                         | 2.171          | 1.991  | 2.070  |
| JGBF-8   | $D_{2d}$ | Johnson-Gyrobifastigium (J26)                   | 13.111         | 13.004 | 13.296 |
| JETBPY-8 | $D_{3h}$ | Johnson-Elongated triangular<br>bipyramid (J14) | 27.790         | 28.196 | 27.866 |
| JBTP-8   | $C_{2v}$ | Johnson-Biaugmented trigonal<br>prism (J50)     | 2.157          | 2.112  | 2.190  |
| BTPR-8   | $C_{2v}$ | Biaugmen tedtrigonal prism                      | 1.666          | 1.643  | 1.696  |
| JSD-8    | $D_{2d}$ | Snub disphenoid (J84)                           | 3.965          | 4.104  | 4.024  |
| TT-8     | $T_d$    | Triakis tetrahedron                             | 13.569         | 13.041 | 13.286 |
| ETBPY-8  | $D_{3h}$ | Elongated trigonal bipyramid                    | 24.659         | 24.230 | 24.442 |
